# Supplementary material for: Molecular Link in Flavonoid and Amino Acid Biosynthesis Contributes to the Flavor of Changqing Tea in Different Seasons
Source: MDPI journal article supplement (doi:10.3390/foods11152289), 2022-07-31
Supplement: s1 [file s1]

Table S1. The primer used for QRT-PCR analysis.

| Gene ID    | Primer pairs            | Tm   | GC%  | Product (bp) |
|------------|-------------------------|------|------|--------------|
| CSS0016564 | AGCACATTCTCAAGACCAACTTC | 56.9 | 43.5 | 140          |
|            | ACTCGTGACTCGCTAACTTCC   | 57.1 | 52.4 |              |
| CSS0005847 | CTAACCCATCCAACAACCAACC  | 56.9 | 50   | 110          |
|            | CCGCAGAGATTGAGAGGAAGG   | 57.4 | 57.1 |              |
| CSS0013230 | AATACTTCACCGATGAGTTCTGG | 55.9 | 43.5 | 130          |
|            | CACCTTGTAATTCCCTTCTCTCC | 56.2 | 47.8 |              |
| CSS0039075 | TCTCCACCGTTGCCATATCC    | 56.5 | 55   | 155          |
|            | GCGATGTGTTGTTGTTGTTGG   | 56.5 | 47.6 |              |
| CSS0029164 | TTGTCTTGACCGCCTCTGATG   | 57.6 | 52.4 | 136          |
|            | GCACTGAGTCTCCGAGTTACC   | 57.4 | 57.1 |              |
| CsGAPDH    | TGGGTGTCAATGAGAAGGATTAC | 60.2 | 43.5 | 114          |
|            | TTTGTGTGGCTGTGATGGAG    | 60.7 | 50   |              |
